# Supplementary material for: Capture of associated targets on chromatin links long-distance chromatin looping to transcriptional coordination
Source: PubMed Central journal article supplement (PMC5028417; doi:10.1038/ncomms12893), 2016-09-16
Supplement: ncomms12893-s1.pdf [file ncomms12893-s1.pdf]

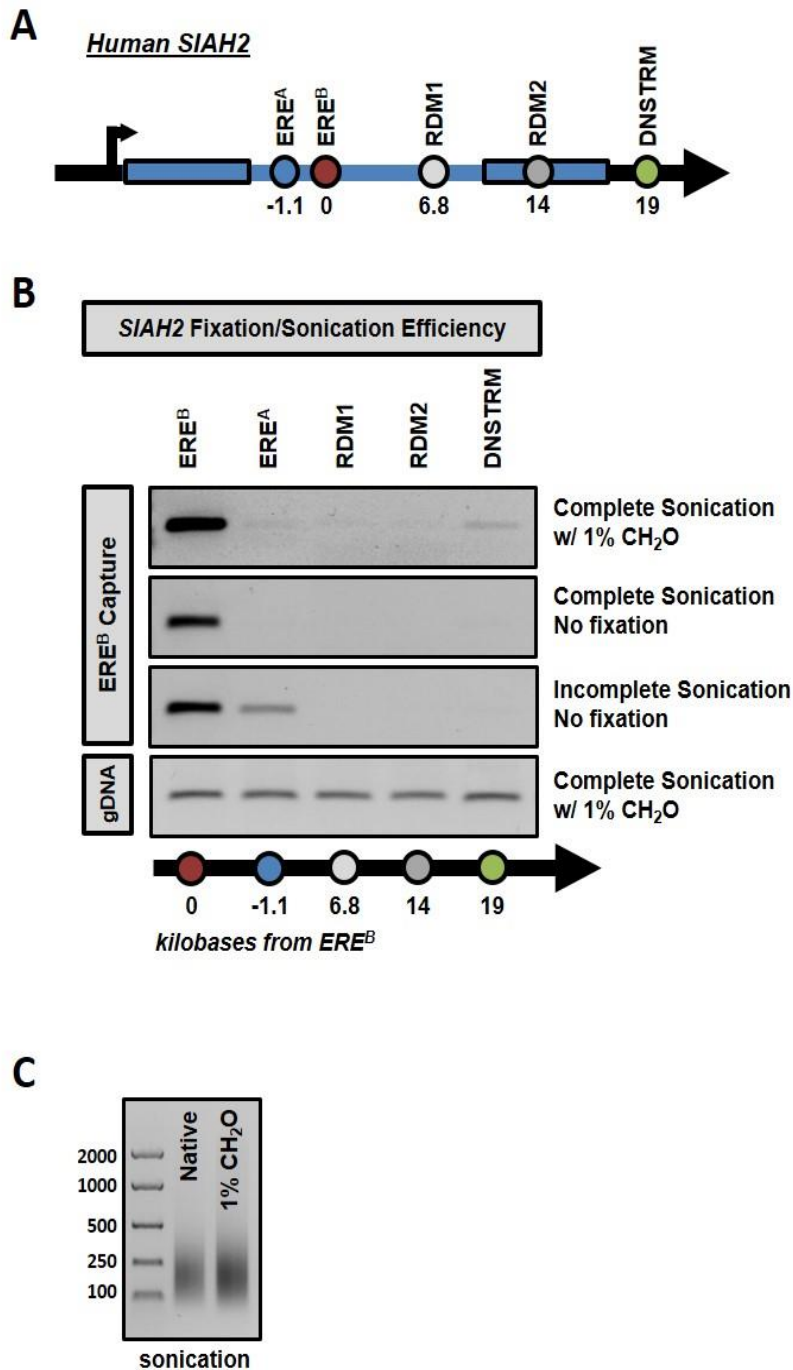

**Supplementary Figure 1:** (A) This diagram represents the relative location of several key EREs within and around the human *SIAH2* gene that were tested via CATCH in part B. (B) The DNA gel image shows that when specifically capturing the ERE<sup>B</sup> locus within the intron of *SIAH2*, incomplete DNA sonication allows capture of a locus approximately 1.1 kb away (ERE<sup>A</sup>). In addition, lack of CH<sub>2</sub>O fixation results in capture of only the targeted fragment. However, with complete sonication and fixation, the ERE downstream of *SIAH2* is also captured with the ERE<sup>B</sup> (DNSTRM). (C) This is a DNA gel image showing representative genomic DNA fragment size after complete sonication, using both unfixed (native) and fixed (1% CH<sub>2</sub>O) MCF-7 cells.

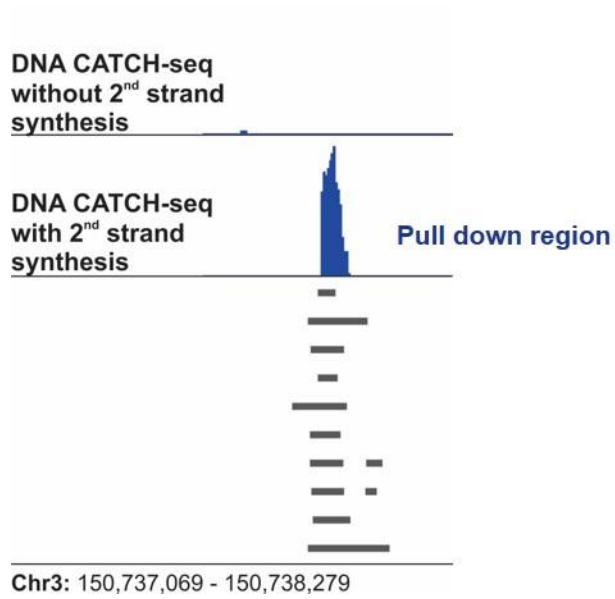

**Supplementary Figure 2:** These histograms (same scale, Y-axis) show that CATCH-seq requires 2<sup>nd</sup> strand synthesis to visualize sequencing from the captured region (complimentary to the biotinylated oligo). The presence of the biotinylated oligo during the CATCH protocol prevents that portion of the genome from rehybridizing with its natural complimentary region of DNA. Subsequently, without second strand synthesis, this locus can not be detected by sequencing.

## Human SIAH2

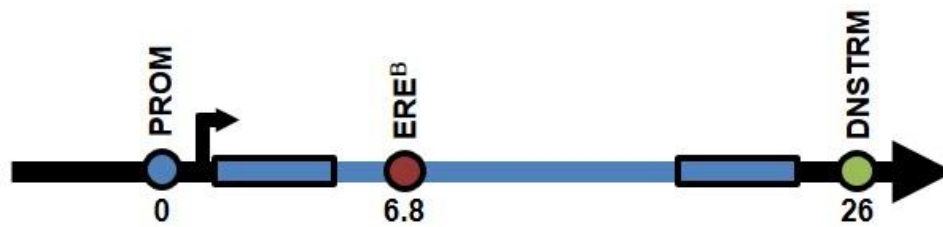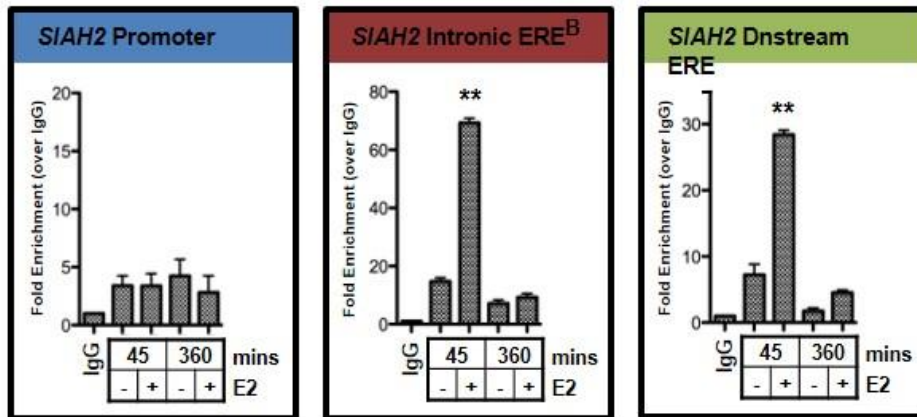

| ChIP-qPCR Primers |                       |
|-------------------|-----------------------|
| Oligo Name        | Sequence 5' to 3'     |
| SIAH2 PROM FWD    | GGGTGTCTTTTCTGGGTIG   |
| SIAH2 PROM REV    | GTTGCCTTTCTCGTTTGAGC  |
| SIAH2 EREB FWD    | TCCACACATAACTGGCCAAA  |
| SIAH2 EREB REV    | CCAATCTGGGCTGGTATTTTA |
| SIAH2 DN FWD      | CCTAATGGATGGCAACTGCT  |
| SIAH2 DN REV      | TTCAGATCAAAGGCCGACTC  |

**Supplementary Figure 3:** This is a chromatin immunoprecipitation experiment showing ER $\alpha$  binding at various locations around the *SIAH2* gene before and after E2 treatment. This experiment validated previous work showing ER $\alpha$  binding at the intronic and downstream EREs, as well as showing a lack of ER $\alpha$  binding at the *SIAH2* promoter in MCF-7 cells, which corroborates previous findings.

## A *Human TFF1*

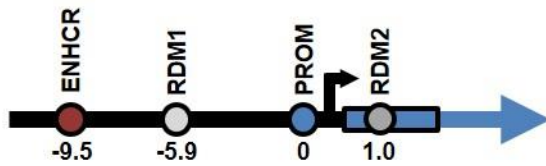

## B

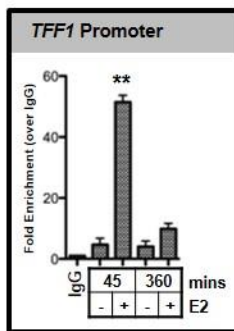

## C

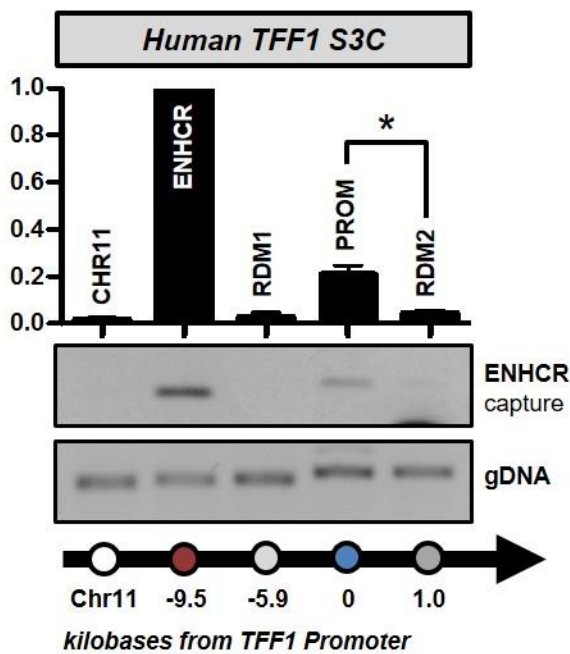

| PCR Primers for S3C Product Detection (TFF1) |                      |                  | Oligos for Targeted Enrichment     |                    |  |
|----------------------------------------------|----------------------|------------------|------------------------------------|--------------------|--|
| Oligo Name                                   | Sequence 5' to 3'    | PCR Product Size | Internal Oligo                     | bp from DNA Target |  |
| CHR11-F                                      | CACACACACACTATGCCTCA | 100              | n/a                                | n/a                |  |
| CHR11-R                                      | TTCGACTCTGCGCTACCGTT |                  |                                    |                    |  |
| TFF1 ENHCR-F                                 | CITTCGGAGGGCCAGATTCA | 105              | /5BioTinTEG/GGTCCCCACAAAGTCAGAATTG | 184                |  |
| TFF1 ENHCR-R                                 | GACTCATGCTGCTCCCTC   |                  |                                    |                    |  |
| TFF1 RDM1-F                                  | GAACTCAGAGCTCCAAGGGT | 108              | n/a                                | n/a                |  |
| TFF1 RDM1-R                                  | GGACAAGTAGCCACCTGAGT |                  |                                    |                    |  |
| TFF1 PROM-F                                  | TGGCAAGCTACATGGAAGGA | 125              | n/a                                | n/a                |  |
| TFF1 PROM-R                                  | AAGGTCAGGTGGAGGAGAC  |                  |                                    |                    |  |
| TFF1 RDM2-F                                  | GGCAGCCGTTGATCCATTC  | 125              | n/a                                | n/a                |  |
| TFF1 RDM2-R                                  | GGTGTGTCAAGTGGATCGG  |                  |                                    |                    |  |

**Supplementary Figure 4:** **(A)** Human *TFF1* is known to have an ER $\alpha$ -binding enhancer region approximately 9.5 kb upstream of its TSS. This diagram shows the approximate location of that enhancer (red circle), the promoter region (blue circle), and each “random” site (grey circles) tested via CATCH, relative to each other and relative to the *TFF1* gene (blue line). **(B)** CHIP experiment showing the responsiveness of the TFF1 promoter to E2 treatment at 45 minutes. Served to validate previous findings, as well as positive control for E2-responsiveness in Supplemental Figure S3. **(C)** The gel image shows the relative intensity of PCR products associated with each tested locus around *TFF1*. The gDNA gel represents the total genomic input to the CATCH protocol, while the ENHCR capture gel represents just the pool of DNA that was enriched after CATCH was done targeting the enhancer region upstream of *TFF1*. The graph displays the mean (SEM error bars) of three experimental replicates. Student’s unpaired t-test of data sets with unequal variance was performed to compare the strongest negative control signal against the promoter region ( \* denotes  $p \leq 0.05$ ).

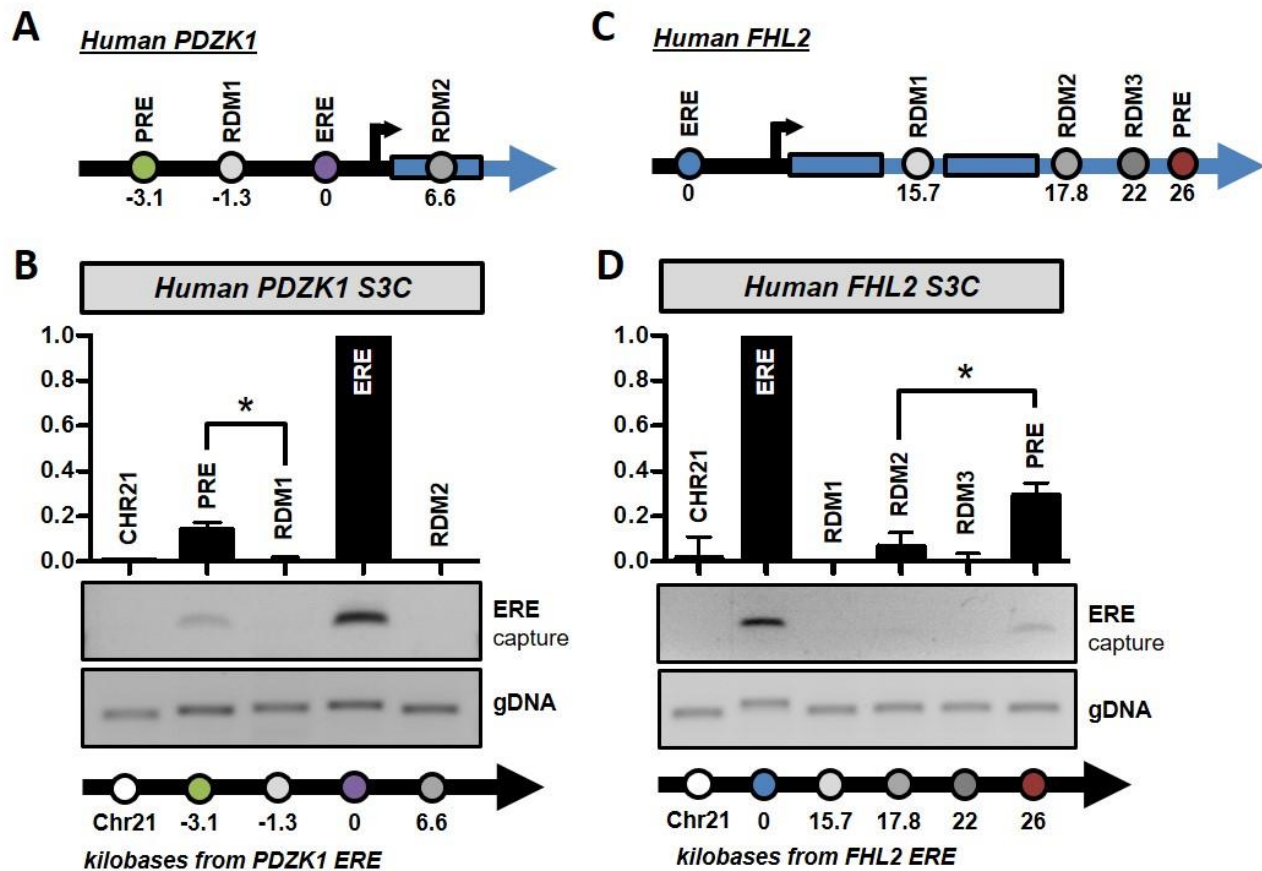

| PCR Primers for S3C Product Detection (PDZK1) |                        |                  | Oligos for Targeted Enrichment        |                    |
|-----------------------------------------------|------------------------|------------------|---------------------------------------|--------------------|
| Oligo Name                                    | Sequence 5' to 3'      | PCR Product Size | Internal Oligo                        | bp from DNA Target |
| CHR21-F                                       | GGCTTGTTTGAGAGAGCGAG   | 100              | n/a                                   | n/a                |
| CHR21-R                                       | TTAACATTGCCCTTGTGCC    |                  |                                       |                    |
| PDZK1 PRE-F                                   | CAGAGTACACAGTCGCCTCT   | 111              | n/a                                   | n/a                |
| PDZK1 PRE-R                                   | GCTCCAGTGGTTTTCTCTCC   |                  |                                       |                    |
| PDZK1 RDM1-F                                  | TGGACTCAAGCATTCTCTCC   | 118              | n/a                                   | n/a                |
| PDZK1 RDM1-R                                  | AGCAATCTGGTCAGGAAGCT   |                  |                                       |                    |
| PDZK1 ERE-F                                   | GGGATTGCGATGAAGTCTCAGG | 123              | /5BioTintEG/TGAAAGATATAGAGGAGGCCAGGAG | 158                |
| PDZK1 ERE-R                                   | ACCAGCTTATCTCTCCACC    |                  |                                       |                    |
| PDZK1 RDM2-F                                  | TGCAGGGATTACAGGTGTGA   | 114              | n/a                                   | n/a                |
| PDZK1 RDM2-R                                  | CCCCTGACATTCTAGCTTGGGA |                  |                                       |                    |

| PCR Primers for S3C Product Detection (FHL2) |                       |                  | Oligos for Targeted Enrichment      |                    |
|----------------------------------------------|-----------------------|------------------|-------------------------------------|--------------------|
| Oligo Name                                   | Sequence 5' to 3'     | PCR Product Size | Internal Oligo                      | bp from DNA Target |
| CHR21-F                                      | GGCTTGTTTGAGAGAGCGAG  | 100              | n/a                                 | n/a                |
| CHR21-R                                      | TTAACATTGCCCTTGTGCC   |                  |                                     |                    |
| FHL2 ERE-F                                   | GCTAGCCCACCAGCCTC     | 129              | /5BioTintEG/CTAGAAGCCCTGCCTTTCTTTGG | 175                |
| FHL2 ERE-R                                   | GGGTCTGAGCTGTACAAATGC |                  |                                     |                    |
| FHL2 RDM1-F                                  | ACACCAGCTATTCTGTGGT   | 110              | n/a                                 | n/a                |
| FHL2 RDM1-R                                  | CGCAGTGTGAATAAGCAGCA  |                  |                                     |                    |
| FHL2 RDM2-F                                  | CCCTGATCCACCACTGAAGT  | 109              | n/a                                 | n/a                |
| FHL2 RDM2-R                                  | GTGGCAGAGATCACATTCTG  |                  |                                     |                    |
| FHL2 RDM3-F                                  | AAACCCACCCTTCTGTCTCTC | 105              | n/a                                 | n/a                |
| FHL2 RDM3-R                                  | GCTGGACCCTGAGAAATGTGA |                  |                                     |                    |
| FHL2 PRE-F                                   | CTGAGAGAAACGTTGCGGAG  | 108              | n/a                                 | n/a                |
| FHL2 PRE-R                                   | CAAAAGACAGAGTGCCTTCCA |                  |                                     |                    |

**Supplementary Figure 5: (A)** Human *PDZK1* contains both ER and PR binding sites just upstream of the TSS. This diagram shows the approximate location of both of those sites (PRE: green and ERE: purple), as well as each “random” site (grey circles) tested via CATCH in part B. **(B)** The gel image shows the relative intensity of PCR products associated with each tested locus around *PDZK1*. The gDNA gel represents total genomic input, and the ERE capture visualizes only the pool of DNA that was enriched after CATCH targeting the estrogen binding element just upstream of the *PDZK1* TSS. The graph displays the mean (SEM error bars) of three experimental replicates. Student’s unpaired t-test of data sets with unequal variance was performed to compare the strongest negative control signal against that of the PRE ( \* denotes  $p \leq 0.05$ ). **(C)** The human *FHL2* gene has an ERE located about 5 kb upstream, and a PRE about 21 kb downstream within its second intron. This diagram shows the relative position of the ERE (blue circle), PRE (red circle), and random sites (grey circles) tested in part D. **(D)** The gel image shows the relative intensity of PCR products associated with each tested locus around *FHL2*. The gDNA gel represents total genomic input, and the ERE capture visualizes only the pool of DNA that was enriched after CATCH targeting the estrogen binding element upstream of the *FHL2* TSS. The graph displays the mean (SEM error bars) of three experimental replicates. Student’s unpaired t-test of data sets with unequal variance was performed to compare the strongest negative control signal against that of the PRE ( \* denotes  $p \leq 0.05$ ).

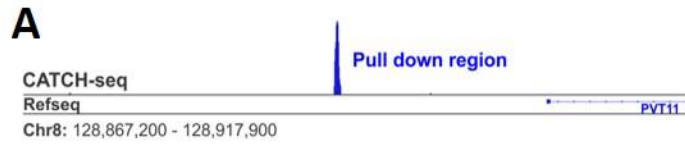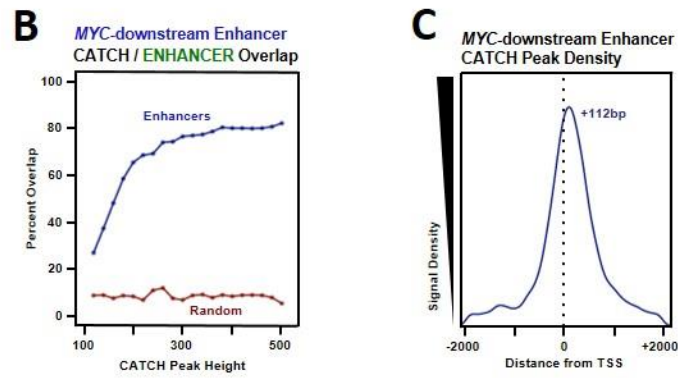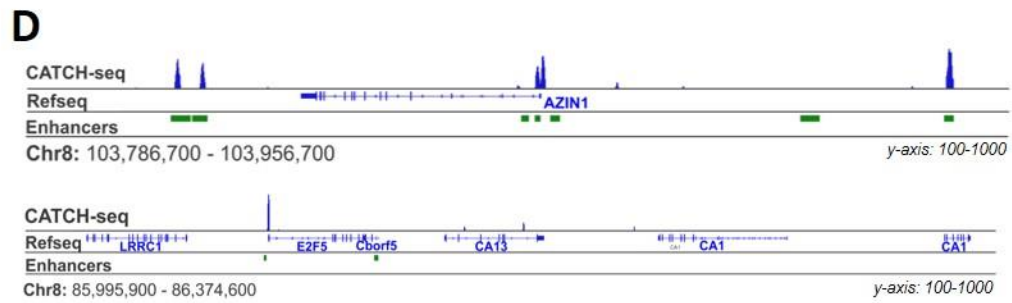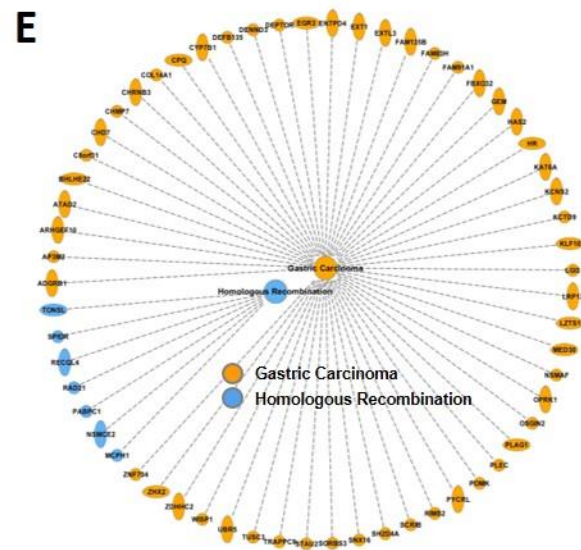



**Supplementary Figure 6:** (A) An enhancer region downstream of *MYC* was directly captured via CATCH. (B) Enhancer downstream of *MYC* CATCH-seq interactions significantly overlap with enhancer marks (blue) compared to statistically randomized control (red); the frequency of these overlaps increase with peak height. (C) The CATCH-seq interactions of the enhancer downstream of *MYC* occur, on average, 112 bp downstream of TSS's on chromosome 8. (D) Examples of raw CATCH-seq histograms (background subtracted) demonstrating the locations of peaks overlapping with enhancer marks. Additionally, the peak at the *E2F5* promoter demonstrates the specificity of CATCH, as no other gene promoters in the region are positive for long-distance interactions. (E) IPA analysis detailing specific gene promoters that demonstrated physical interaction with the enhancer downstream of *MYC*. The most significantly enriched process (blue) and disease (orange) enriched within this dataset was homologous recombination and gastric carcinoma, respectively.

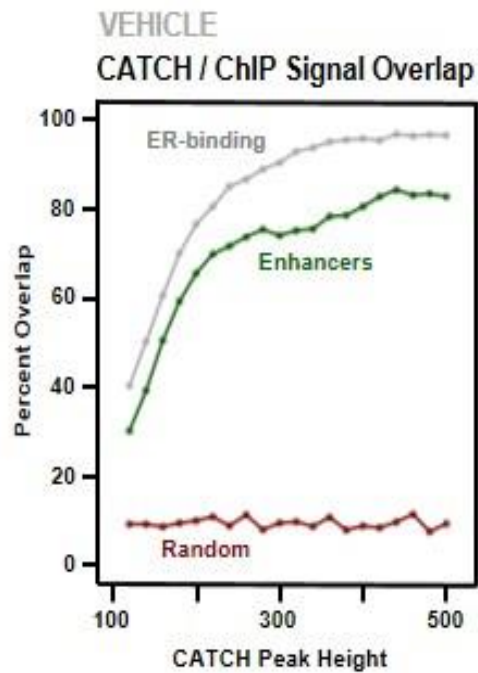

**Supplementary Figure 7:** *SIAH2* (vehicle-treated) enhancer CATCH-seq interaction peaks significantly overlap with enhancer marks (green) and ER-binding sites (gray) compared to statistically random control (red); the frequency of these overlaps increase with peak height. The same pattern is observed with estradiol treatment in Figure 4E.

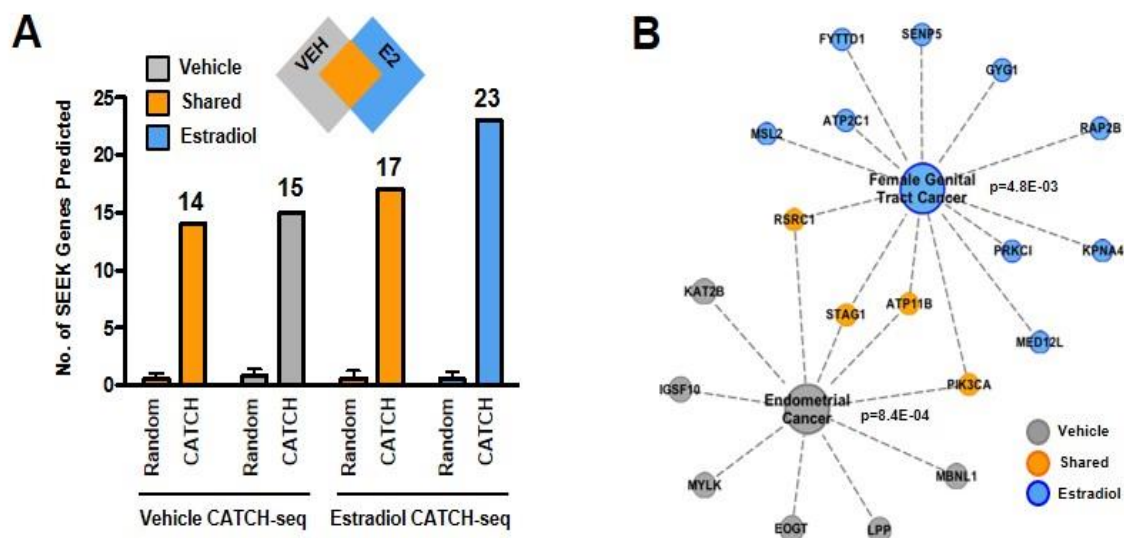

**Supplementary Figure 8: (A)** Graph detailing the number of SEEK genes ‘predicted’ by the vehicle-treated (gray) or estradiol-treated versions of *SIAH2* enhancer CATCH-seq genome-wide. Genes predicted by both conditions (the majority) are in orange. **(B)** IPA showing the topmost statistically significant and enriched pathway for each small gene subset identified by CATCH-seq / SEEK overlap: female genital tract cancer (estradiol treated; blue) and endometrial cancer (vehicle treated; gray).

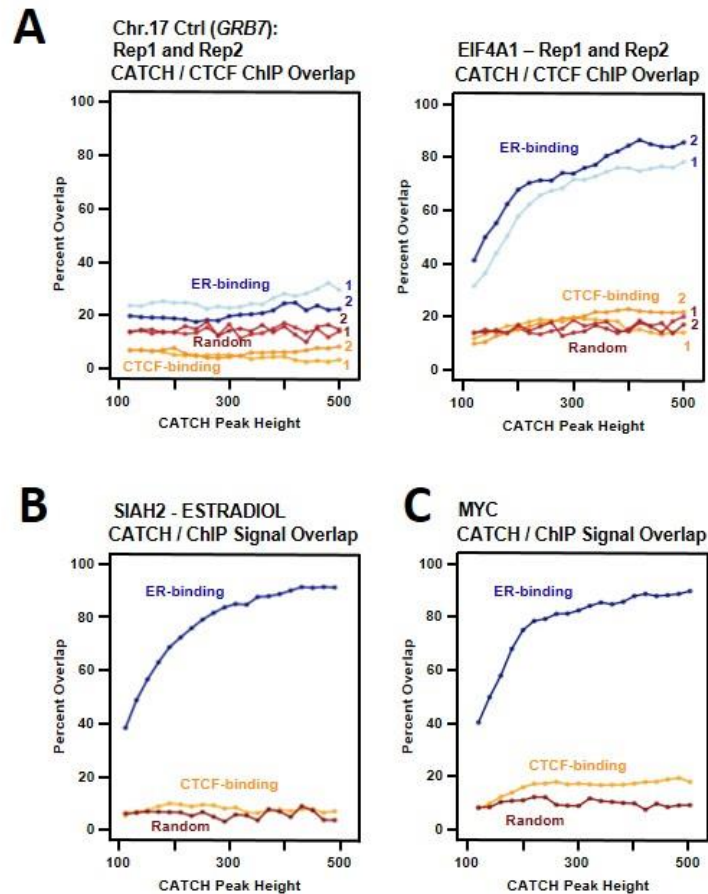

**Supplementary Figure 9:** Analysis of CTCF binding adjacency/overlap with CATCH peaks. Numbers 1 and 2 denote replicates for *GRB7* and *EIF4A1*. **(A, left)** Control *GRB7* promoter region CATCH-seq interaction peaks do not significantly overlap with CTCF-binding sites (orange) and have very modest overlap with ER-binding sites (blue) compared to statistically random control (red); the frequency of these overlaps does not increase with peak height. **(A, right)** *EIF4A1* promoter region CATCH-seq interaction peaks do not significantly overlap with CTCF-binding sites (orange), but have significant overlap with ER-binding sites (blue) compared to statistically random control (red); the frequency of the latter overlaps increases as a function of peak height. **(B)** *SIAH2* downstream enhancer region CATCH-seq interaction peaks do not significantly overlap with CTCF-binding sites (orange), but have significant overlap with ER-binding sites (blue) compared to statistically random control (red); the frequency of the latter overlaps increases as a function of peak height. **(C)** *MYC* downstream enhancer region CATCH-seq interaction peaks show modest overlap with CTCF-binding sites (orange), but have significant overlap with ER-binding sites (blue) compared to statistically random control (red); the frequency of both overlaps increases, to some degree, as a function of peak height.

**A**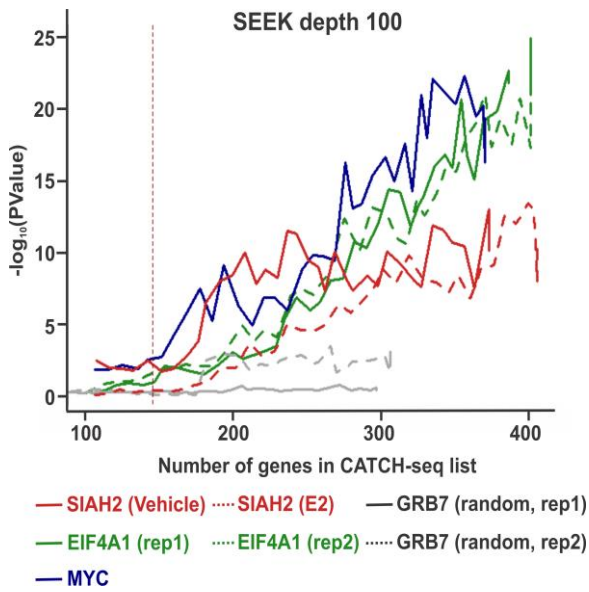**B**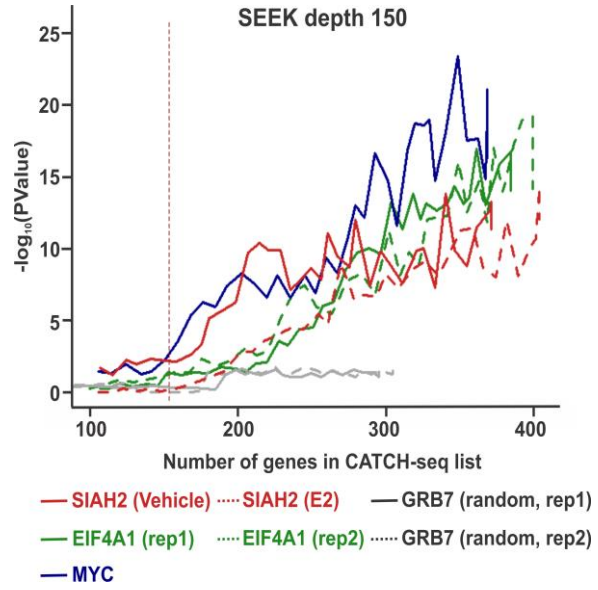**C**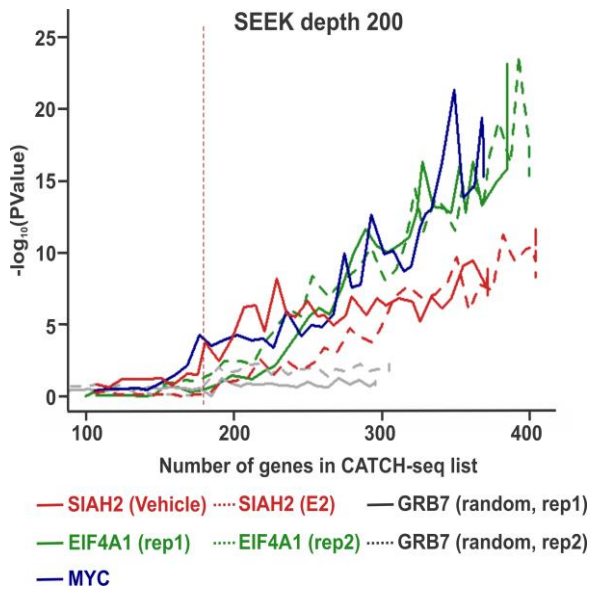**D**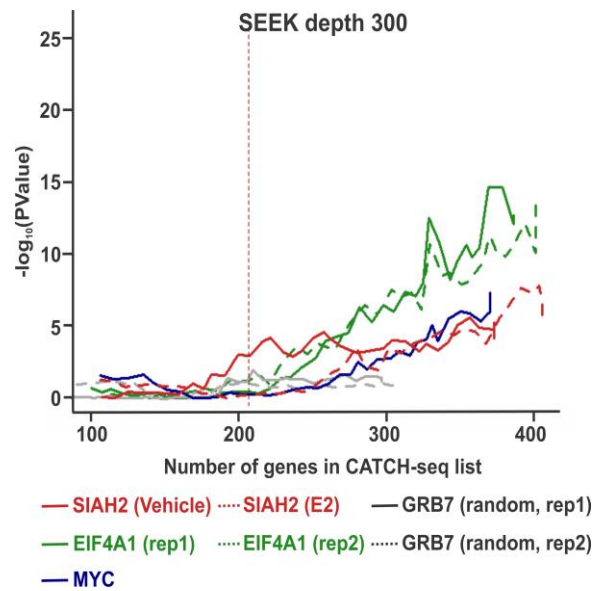

**Supplementary Figure 10:** The graphs depict, using a constant SEEK list of the top 100, 150, 200, or 300 identified genes, the continuous p-value of each CATCH experiment as the number of CATCH genes identified (used) in the analysis decreases. The vertical dotted red lines indicate the average point (of all CATCH experiments on the graph) at which CATCH results become non-significant ( $p=0.01$ ). As CATCH is used to identify more gene promoters, its ability to predict transcriptionally co-expressed genes (as measured by SEEK) increases. The negative  $\log_{10}$  of the p value was plotted on the y-axis against the number of CATCH genes used on the x-axis. The continuous p value was graphed for every CATCH experiment at varying steady-state SEEK depths of 100 (A), 150 (B), 200 (C) and 300 (D). The p-value here, is the effective point at which CATCH results can no longer, with p degree of certainty, be sure that a given identified gene is reliably co-expressed.

**Supplementary Table 1. Basic Comparison of DNA-DNA Interaction Detection Techniques**

| Technique    | Cardinality  | Resolution     | Advantages                                                                                                                    | Disadvantages                                                                                                                         |
|--------------|--------------|----------------|-------------------------------------------------------------------------------------------------------------------------------|---------------------------------------------------------------------------------------------------------------------------------------|
| 3C-qPCR      | One-to-one   | kilobases      | Simple                                                                                                                        | Long protocol, labor intensive, many controls, foreknowledge of interactions required                                                 |
| 3C/4C-seq    | One-to-all   | kilobases      | Improved resolution over qPCR, can adapt for higher throughput                                                                | Single locus per experiment, more complex data analysis                                                                               |
| 5C           | Many-to-many | kilobases      | Can identify interactions between many fragments                                                                              | Highly labor intensive, not genome-wide, challenging primer design, more complex data analysis                                        |
| Hi-C         | All-to-all   | kilo/megabases | Genome-wide, all-to-all interactions                                                                                          | Cost-prohibitive, massive sequencing depth required, poor resolution, advanced bioinformatics required, all-to-all can be confounding |
| ChIA-PET     | Many-to-all  | kilobases      | Genome-wide detection, enzymatic digestion not required                                                                       | Requires antibodies, can only detect the interactions resulting from a single protein                                                 |
| T2C          | Many-to-all  | kilobases      | Can detect regional interactions, less expensive than Hi-C or 5C                                                              | Restricted to selected genomic regions, advanced bioinformatics required, large primer design effort                                  |
| <b>CATCH</b> | One-to-all   | centibases     | Most cost effective technique, takes only 24 hours to complete, no enzymatic digestion/ligation, highest resolution/detection | Requires selecting locus to probe (one-to-all), single pulldown locus per experiment                                                  |

**Supplementary Table 2. SEEK list "seed" genes from associated CATCH pulldowns**

| Chr17 Ctrl <i>GRB7</i> 17q12 |          | <i>EIF4A1</i> 17p13 |          | <i>SIAH2</i> (vehicle) 3q25 |           | <i>SIAH2</i> (estradiol) 3q25 |          | <i>MYC</i> 8q24.21 |          |
|------------------------------|----------|---------------------|----------|-----------------------------|-----------|-------------------------------|----------|--------------------|----------|
| Gene                         | Cytoband | Gene                | Cytoband | Gene                        | Cytoband  | Gene                          | Cytoband | Gene               | Cytoband |
| <i>ZNF385C</i>               | 17q21.2  | <i>FXR2</i>         | 17p13.1  | <i>GYG1</i>                 | 3q24-25.1 | <i>TSC22D2</i>                | 3q25.1   | <i>TRIB1</i>       | 8q24.13  |
| <i>KRT31</i>                 | 17q21.2  | <i>SEN3</i>         | 17p13    | <i>IGSF10</i>               | 3q25.1    | <i>EIF2A</i>                  | 3q25.1   | <i>FAM84B</i>      | 8q24.21  |
| <i>KRT39</i>                 | 17q21.2  | <i>POLR2A</i>       | 17p13.1  | <i>MBNL1</i>                | 3q25      | <i>MED12L</i>                 | 3q25.1   | <i>SQLE</i>        | 8q24.1   |

**Supplementary Table 3. CATCH pull-down and SEEK gene list details**

| CATCH pull-down Experiment | chromosomal location of pull-down | Number of total SEEK genes on chromosome | Number of SEEK genes analyzed (top hits; genome) | Number of SEEK genes analyzed from pull-down chr | Number of genes below p value 0.01 | Number of SEEK genes predicted by CATCH (below p value 0.01) | Percent SEEK genes predicted |
|----------------------------|-----------------------------------|------------------------------------------|--------------------------------------------------|--------------------------------------------------|------------------------------------|--------------------------------------------------------------|------------------------------|
| Chr17 Ctrl ( <i>GRB7</i> ) | chr:17q12                         | 993                                      | 100                                              | 27                                               | 26                                 | 0                                                            | 0.0%                         |
| <i>EIF4A1</i>              | chr:17p13                         | 1001                                     | 100                                              | 74                                               | 67                                 | 16                                                           | 23.9%                        |
| <i>MYC</i>                 | chr:8q24.21                       | 565                                      | 100                                              | 82                                               | 71                                 | 46                                                           | 64.8%                        |
| <i>SIAH2</i> (vehicle)     | chr:3q25                          | 939                                      | 150                                              | 62                                               | 49                                 | 15                                                           | 30.6%                        |
| <i>SIAH2</i> (estradiol)   | chr:3q25                          | 948                                      | 150                                              | 70                                               | 54                                 | 23                                                           | 42.6%                        |

**Supplementary Table 4. Effect of total SEEK genes analyzed on CATCH/SEEK prediction**

| <b>Sample</b>        | <b>No. top SEEK Genes Analyzed</b> | <b>No. SEEK genes on pulldown chr*</b> | <b>Seek genes predicted at random*</b> | <b>SEEK genes predicted by CATCH*</b> | <b>p value</b> |
|----------------------|------------------------------------|----------------------------------------|----------------------------------------|---------------------------------------|----------------|
| <i>GRB7</i> (ctrl)   | 100                                | 26                                     | 1.7                                    | 0                                     | 0.12           |
| <i>GRB7</i> (ctrl)   | 200                                | 35                                     | 2.5                                    | 0                                     | 0.1            |
| <i>GRB7</i> (ctrl)   | 500                                | 48                                     | 4.4                                    | 0                                     | 0.03           |
| <i>EIF4A1</i>        | 100                                | 67                                     | 9.1                                    | 16                                    | 3.70E-03       |
| <i>EIF4A1</i>        | 200                                | 83                                     | 11.5                                   | 23                                    | 8.42E-05       |
| <i>EIF4A1</i>        | 500                                | 96                                     | 17                                     | 30                                    | 8.72E-04       |
| <i>SIAH2</i> vehicle | 150                                | 49                                     | 4.4                                    | 15                                    | 1.80E-08       |
| <i>SIAH2</i> vehicle | 200                                | 53                                     | 5.2                                    | 15                                    | 4.46E-05       |
| <i>SIAH2</i> vehicle | 500                                | 59                                     | 8.5                                    | 17                                    | 3.00E-03       |
| <i>SIAH2</i> E2      | 150                                | 54                                     | 8                                      | 23                                    | 3.60E-13       |
| <i>SIAH2</i> E2      | 200                                | 58                                     | 9.8                                    | 25                                    | 4.57E-12       |
| <i>SIAH2</i> E2      | 500                                | 71                                     | 14.4                                   | 34                                    | 1.08E-08       |
| <i>MYC</i>           | 100                                | 71                                     | 20                                     | 46                                    | 2.13E-12       |
| <i>MYC</i>           | 200                                | 96                                     | 29.2                                   | 62                                    | 2.76E-16       |
| <i>MYC</i>           | 500                                | 110                                    | 37.5                                   | 72                                    | 4.06E-11       |

\*p value cutoff 0.01



| Supplementary Table 5. CATCH-SEEK Gene-expression Prediction |              |         |                                  |              |         |
|--------------------------------------------------------------|--------------|---------|----------------------------------|--------------|---------|
| SIAH2 Enhancer CATCH / Vehicle                               |              |         | SIAH2 Enhancer CATCH / Estradiol |              |         |
| Gene                                                         | Co-exp Value | p value | Gene                             | Co-exp Value | p value |
| <i>AADACP1</i>                                               | ---          | ---     | <i>TSC22D2</i>                   | ---          | ---     |
| <i>IGSF10</i>                                                | ---          | ---     | <i>EIF2A</i>                     | ---          | ---     |
| <i>MBNL1</i>                                                 | ---          | ---     | <i>MED12L</i>                    | ---          | ---     |
| <i>MFSD1</i>                                                 | 1.1327       | 0       | <i>KPNA4</i>                     | 1.004        | 0.0001  |
| <i>ARL6IP5</i>                                               | 0.9526       | 0.0026  | <i>STAG1</i>                     | 0.9164       | 0.0008  |
| <i>ACAP2</i>                                                 | 0.9442       | 0.0041  | <i>CCNL1</i>                     | 0.8872       | 0.0014  |
| <i>KAT2B</i>                                                 | 0.8731       | 0.0006  | <i>ACAP2</i>                     | 0.8624       | 0.0053  |
| <i>PLSCR4</i>                                                | 0.8729       | 0.0059  | <i>FYTTD1</i>                    | 0.8315       | 0.0026  |
| <i>PIK3CA</i>                                                | 0.8722       | 0.0081  | <i>PIK3CA</i>                    | 0.8125       | 0.0062  |
| <i>STAG1</i>                                                 | 0.831        | 0.0082  | <i>DLG1</i>                      | 0.7784       | 0.0017  |
| <i>RAB7A</i>                                                 | 0.7988       | 0.0062  | <i>TBC1D23</i>                   | 0.7773       | 0.0021  |
| <i>ZBTB38</i>                                                | 0.7949       | 0.0013  | <i>ATP11B</i>                    | 0.7716       | 0.0013  |
| <i>EOGT</i>                                                  | 0.793        | 0.0037  | <i>PRKCI</i>                     | 0.7609       | 0.0002  |
| <i>LPP</i>                                                   | 0.7367       | 0.0052  | <i>CDV3</i>                      | 0.7466       | 0.0015  |
| <i>CDV3</i>                                                  | 0.7348       | 0.0054  | <i>ZNF639</i>                    | 0.7423       | 0.0005  |
| <i>RSRC1</i>                                                 | 0.7215       | 0.0018  | <i>CLDND1</i>                    | 0.7336       | 0.0014  |
| <i>ATP11B</i>                                                | 0.7129       | 0.0096  | <i>RSRC1</i>                     | 0.7299       | 0.0003  |
| <i>MYLK</i>                                                  | 0.6905       | 0.0078  | <i>ATP2C1</i>                    | 0.7268       | 0.0071  |
|                                                              |              |         | <i>RASA2</i>                     | 0.7165       | 0.0019  |
|                                                              |              |         | <i>SSR3</i>                      | 0.6475       | 0.0031  |
|                                                              |              |         | <i>RAP2B</i>                     | 0.6412       | 0.0002  |
|                                                              |              |         | <i>SIAH2</i>                     | 0.6313       | 0.0006  |
|                                                              |              |         | <i>LRRC58</i>                    | 0.6276       | 0.0042  |
|                                                              |              |         | <i>GYG1</i>                      | 0.6146       | 0.003   |
|                                                              |              |         | <i>SENP5</i>                     | 0.6083       | 0.0049  |
|                                                              |              |         | <i>MSL2</i>                      | 0.608        | 0.0067  |

**Supplementary Table 5:** Table contains the lists of genes that had both significant CATCH-seq signal peaks within 2kb of their promoters, and were also identified by SEEK as being transcriptionally co-expressed with one another. **NB:** *SIAH2* is independently identified (w/ estradiol treatment).

## Supplementary Methods

### Capture of Associated Targets on Chromatin User Protocol

#### **Part 1: Nuclear isolation, crosslinking and chromatin shearing**

1. Be sure that cells are in log-phase growth.
2. Aspirate cell-growth media.
3. Add 2% Formaldehyde (in serum-free RPMI) (2 ml 16% formaldehyde per 14 ml PBS) to cell culture.
4. Incubate for 10 min at 25°C, gently rocking.
5. Aspirate 2% formaldehyde solution.
6. Quench crosslinking by adding 10 ml of 250 mM Tris-HCl pH 8.0 (in PBS).
7. Incubate for 5 min at 25°C, gently rocking.
8. Scrape cells in 1.0 ml PBS to harvest.
9. Centrifuge cells at 1,500 x g for 6 minutes and aspirate supernatant.
10. Wash cell pellet in PBS and resuspend in 500 µl Sucrose Buffer + PIC.
11. Dounce homogenize 30 times with a tight fitting pestle.
12. Centrifuge for 10 minutes at 6500 RPM at 4°C.
13. Aspirate supernatant and resuspend pellet again in 120 µl of CATCH buffer + PIC.
14. Sonicate samples (BioRuptor, 2 x 7 minutes on High, 30s on/off).
15. Pellet debris at 14,000 RPM for 10 minutes at 4°C.
16. Transfer supernatant to a new 1.5 ml tube.

#### **Part 2: Pre-clearing and hybridization**

1. Incubate the chromatin sample at 58°C for 5 minutes to unmask endogenous biotin.
2. Add 10 µl of pre-equilibrated (in CATCH buffer) streptavidin magnetic beads to the sample.
3. Incubate 60 min at 25°C while rotating.
4. Pull out magnetic beads and transfer cleared chromatin supernatant to a PCR tube.
5. Add biotinylated oligo probe (300 nM final conc.) to the chromatin sample.
6. Hybridize the probe to the chromatin as follows (**blue** step should be at least 5°C above the  $T_m$  of the oligo; **red** step should be done below the  $T_m$  of the oligo):
  - 25°C for 1 min (equilibration)
  - 81°C for 4 min (gDNA denaturation)
  - 72°C - 50°C** decreasing gradient (15 sec per 1°C)
  - 42°C** for 10 min (hybridization)
  - 25°C hold
7. Remove unhybridized oligo and other impurities with illustra sephacryl (S-400 HR) microspin column according to manufacturer's instructions.
8. Transfer sample to a new 1.5 ml tube and add 300 µl of DNase/RNase free H<sub>2</sub>O.
9. Add 25 µl of pre-equilibrated (in CATCH buffer) streptavidin magnetic beads to the sample.
10. Incubate for 60 min at 25°C while rotating.

#### **Part 3: De-crosslinking and protein digestion**

1. Immobilize beads on magnetic stand, aspirate unhybridized supernatant and wash samples 3x in CATCH buffer at 42°C while shaking at 1000 rpm on a thermomixer.
  2. Resuspend beads in 150 µl of De-crosslinking buffer supplemented with 1 µl of 20 mg/ml RNase A.
  3. Incubate at 55°C while shaking at 700 rpm on a thermomixer for 60 minutes.
  4. Add 5 µl of 20 mg/ml Proteinase K to each sample.
- USER PROTOCOL
5. Incubate at 65°C while shaking at 700 rpm on a thermomixer for 3-6 hr (or overnight) to de-crosslink.

6. Incubate at 100°C for 1 minute.
7. Remove magnetic beads and transfer DNA sample to a new 1.5 ml tube.

#### **Part 4: DNA Purification**

1. Extract once with Phenol:Chloroform:IAA.
2. Extract again with Phenol:Chloroform:IAA, and then once with Chloroform to remove any residual Phenol.
3. Add 10 µg glycogen, 1/10 volume of 3M Sodium Acetate pH 5.2, and 2.5 volumes of 200 proof ethanol.
4. Precipitate DNA at -20°C or at -80°C for 2 hours.
5. Centrifuge at 14,000 rpm for 30 minutes, wash with 70% ethanol and dry pellet.
6. Resuspend the DNA pellet in 30 µl of 10mM Tris-Cl pH 8.5 or nuclease-free H<sub>2</sub>O.
7. Proceed immediately to 2<sup>nd</sup> strand synthesis.

#### **CATCH Buffer (40 ml)**

- 400 µl of 1.0 M HEPES (10 mM)
- 240 µl of 5.0 M NaCl (30 mM)
- 160 µl of 0.5 M EDTA pH 8.0 (2 mM)
- 400 µl of 20% SDS (0.2%)
- H<sub>2</sub>O to 40 ml
- Add Protease Inhibitors fresh

#### **De-crosslinking Buffer (10 ml)**

- 300 µl of 1.0 M Tris-Cl pH 8.0 (30 mM)
- 60 µl of 5.0 M NaCl (30 mM)
- 10 µl of 0.5 M EDTA (0.5 mM)
- 2 µl of 0.5 M EGTA (0.1 mM)
- 500 µl of 20% (w/v) SDS (1%)
- H<sub>2</sub>O to 10 ml
- Add RNase and Proteinase K (fresh)

#### **Sucrose Buffer (10 ml)**

- 100 µl of 1.0 M HEPES pH 8.0 (10 mM)
- 1.03 g of Sucrose (0.3 M)
- 30 µl of 1.0 M CaCl<sub>2</sub> (3 mM)
- 20 µl of 1.0 M MgOAc (2 mM)
- 100 µl of Triton-X100 (1%)
- H<sub>2</sub>O to 10 ml
